# 1 **A model of ganglion axon pathways accounts for percepts elicited** 2 **by retinal implants**

3 Michael Beyeler<sup>1,2,3,\*</sup>, Devyani Nanduri<sup>4</sup>, James D. Weiland<sup>4,5</sup>, Ariel Rokem<sup>2,3</sup>, Geoffrey M.  
4 Boynton<sup>1</sup>, and Ione Fine<sup>1</sup>

5 <sup>1</sup>Department of Psychology, University of Washington, Seattle, WA 98195, USA

6 <sup>2</sup>Institute for Neuroengineering, University of Washington, Seattle, WA 98195, USA

7 <sup>3</sup>eScience Institute, University of Washington, Seattle, WA 98195, USA

8 <sup>4</sup>Department of Biomedical Engineering, University of Southern California, Los Angeles, CA  
9 90033, USA

10 <sup>5</sup>Department of Biomedical Engineering, University of Michigan, Ann Arbor, MI 48109, USA

11 \*Correspondence: [mbeyeler@uw.edu](mailto:mbeyeler@uw.edu)

## 12 **Abstract**

13 Degenerative retinal diseases such as retinitis pigmentosa and macular degeneration cause  
14 irreversible vision loss in more than 10 million people worldwide. Retinal prostheses, now  
15 implanted in more than 250 patients worldwide, electrically stimulate surviving cells in order to  
16 evoke neuronal responses that are interpreted by the brain as visual percepts ('phosphenes').  
17 However, instead of seeing focal spots of light, users of current epiretinal devices perceive highly  
18 distorted phosphenes, which vary in shape not just across subjects but also across electrodes,  
19 resulting in distorted percepts. We characterized these distortions by asking users of the Argus  
20 retinal prosthesis system (Second Sight Medical Products, Inc.) to draw percepts elicited by single-  
21 electrode stimulation on a touchscreen. Based on ophthalmic fundus photographs, we then  
22 developed a computational model of the topographic organization of optic nerve fiber bundles in  
23 each subject's retina, and used this model to successfully simulate predicted patient percepts. Our  
24 model shows that activation of passing axon fibers contributes to the rich repertoire of phosphene  
25 shapes reported by patients in our psychophysical measurements, successfully replicating visual  
26 percepts ranging from 'blobs' to oriented 'streaks' and 'wedges' depending on the retinal location  
27 of the stimulating electrode. This model provides a first step towards future devices that  
28 incorporate stimulation strategies tailored to each individual patient's retinal neurophysiology.

## 29 **Impact**

30 Current retinal implant users report seeing distorted and often elongated shapes rather than small  
31 focal spots of light that match the shape of the implant electrodes. Here we show that the perceptual  
32 experience of retinal implant users can be accurately predicted using a computational model that  
33 simulates each individual patient's retinal ganglion axon pathways. This opens up the possibility  
34 for future devices that incorporate stimulation strategies tailored to each individual patient's retina.

## 35 1. Introduction

36 Degenerative retinal diseases such as retinitis pigmentosa (Hartong et al., 2006) and macular  
37 degeneration (Jager et al., 2008) lead to a loss of photoreceptor cells and subsequent remodeling  
38 of the neural circuitry in the retina (Marc and Jones, 2003; Marc et al., 2003), causing irreversible  
39 blindness in more than 10 million people worldwide. Analogous to cochlear implants, the goal of  
40 retinal prostheses is to help alleviate these incurable conditions by electrically stimulating  
41 surviving cells in the retina (for a recent review, see Weiland et al., 2016). The hope is that  
42 electrically evoked neuronal responses will be transmitted to the brain and interpreted by the  
43 subject as visual percepts ('phosphenes').

44 Two devices are already approved for commercial use: Argus II (epiretinal, Second Sight  
45 Medical Products Inc., da Cruz et al., 2016; Rizzo et al., 2014) and Alpha-IMS (subretinal, Retina  
46 Implant AG, Stingl et al., 2015), which have been shown to restore vision up to a visual acuity of  
47 20/1,260 (Humayun et al., 2012) and 20/546 (Stingl et al., 2015), respectively. In addition, PRIMA  
48 (subretinal, Pixium Vision, Lorach et al., 2015) has started clinical trials, with others to follow  
49 shortly. In combination with stem cell therapy (Chader and Young, 2016; da Cruz et al., 2018) and  
50 optogenetics (Gaub et al., 2015), a range of sight restoration options should be available within a  
51 decade (Fine et al., 2015).

52 However, despite the increasing clinical and commercial use of these devices, the perceptual  
53 experience of retinal implant users remains poorly understood. For example, even in response to  
54 single-electrode stimulation, the appearance of individual phosphenes is highly variable not only  
55 across subjects but also across electrodes within a subject, with subjects typically reporting seeing  
56 distorted and often elongated geometric shapes that fade quickly over time (Caspi et al., 2009;  
57 Horsager et al., 2009; Luo et al., 2016; Nanduri et al., 2008; Pérez Fornos et al., 2012; Rizzo et al.,  
58 2003; Wilke et al., 2011a; Yanai et al., 2007). Furthermore, linearly combining these 'building  
59 blocks' of percepts from individual electrodes often fails to predict the combination of percepts  
60 evoked when multiple electrodes are stimulated (Horsager et al., 2011; Horsager et al., 2010; Rizzo  
61 et al., 2003; Wilke et al., 2011b). Consequently, most subjects cannot determine the orientation of  
62 gratings that are used to measure visual acuity, and those who can recognize letters take more than  
63 40 seconds to do so (da Cruz et al., 2013; Zrenner et al., 2011).

64 Both computational (Esler et al., 2018; Tahayori et al., 2014) and *in vitro* electrophysiological  
65 studies (Fried et al., 2009; Rizzo et al., 2003; Weitz et al., 2015) suggest that electrode  
66 configurations similar to those implanted in patients do not achieve focal activation, but rather  
67 produce significant activation of passing axon fibers, which may result in perceptual distortions in  
68 patients. Here, we are the first to directly examine whether axonal stimulation contributes to the  
69 rich repertoire of phosphene shapes reported by patients. Our computational model can account  
70 for the apparent shape of phosphenes elicited by single-electrode stimulation in two generations  
71 of the Argus retinal prosthesis system (Second Sight Medical Products, Inc.).

72 Four subjects suffering from severe retinitis pigmentosa were chronically implanted with an  
73 epiretinal prosthesis in the macular region of the retina: one subject was implanted with an Argus I  
74 device (16 platinum disc electrodes arranged in a 4x4 checkerboard pattern; see **Figure 1A**), and  
75 three subjects were implanted with Argus II device (60 platinum disc electrodes in a 6x10  
76 arrangement; **Figure 1B**). Electrical stimulation was delivered to a number of pre-selected  
77 electrodes in random order (five repetitions each) using square-wave, biphasic, cathodic-first pulse  
78 trains with fixed stimulus duration, and we asked subjects to outline perceived phosphene shape  
79 either on a grid screen (Argus I; **Figure 1B, C**) or a computer touch screen (Argus II; **Figure 1E,**  
80 **F**) (see Methods). We then used a computational model to generate predictions about the apparent  
81 shape of the expected visual percepts, and compared the predicted images to patient phosphene  
82 drawings. The model assumed that distortions are due to activation of ganglion axon pathways,  
83 having estimated the spatial layout of these pathways using traced nerve fiber bundle trajectories  
84 extracted from ophthalmic fundus photographs of 55 human eyes (Jansonius et al., 2009).

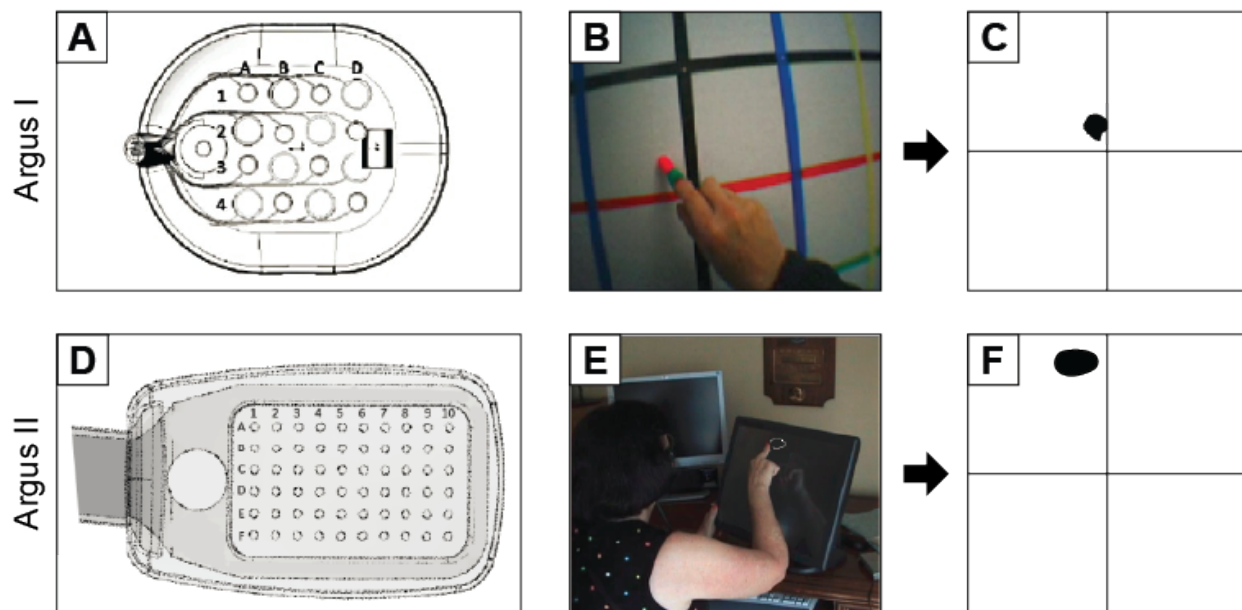

**Figure 1:** Retinal implants used for the drawing task. (A) Argus I electrode array (4x4 electrodes of 260  $\mu\text{m}$  or 520  $\mu\text{m}$  diameter arranged in a checkerboard pattern). (B) Argus I subject drawings on a grid screen were captured by an external camera and recorded to a video file. (C) Video files were analyzed offline by tracking the location of the fingertip frame-by-frame and by translating the drawings to a binary image. (D) Argus II electrode array (6x10 electrodes of 200  $\mu\text{m}$  diameter). (E) Argus II subject drawings were recorded by a touch screen monitor. (F) Subject drawings were translated to a binary image. Shapes were closed by automatically connecting the first and last tracked fingertip location, after which a floodfill was applied.

## 85 2. Results

### 86 2.1 Phosphene drawings vary across electrodes, but are relatively consistent for a given 87 electrode

88 All subjects consistently reported seeing phosphenes upon electrical stimulation of the retina.  
89 Phosphenes appeared light gray, white, or yellowish in color. However, phosphene drawings  
90 varied greatly across subjects and electrodes; representative drawings for each subject are shown  
91 in **Figure 2**. Whereas stimulation of some electrodes elicited consistent percepts across trials (top  
92 row of panels in each subplot), stimulation of other electrodes led to percepts that varied in both  
93 size and shape across trials (bottom row of panels in each subplot). Subjects occasionally but rarely

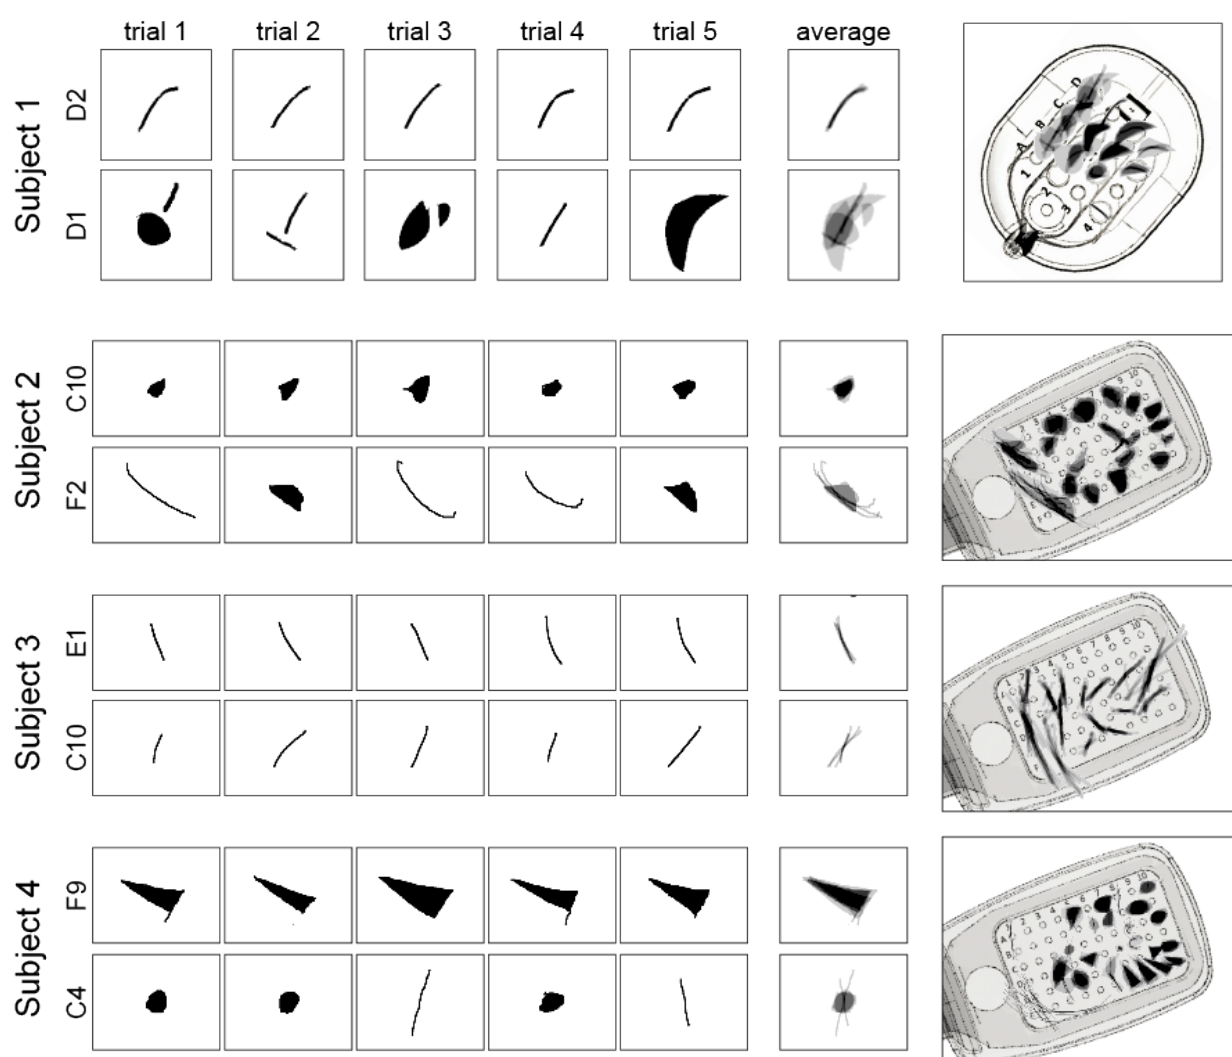

**Figure 2:** Phosphene drawings vary across electrodes. Drawings from individual trials are shown for the most consistent (top row in each panel) and least consistent electrodes (bottom row in each panel) for Subjects 1–4. Mean images (labeled ‘average’) were obtained by averaging drawings from individual trials aligned at their center of mass. These averaged drawings were then overlaid over the corresponding electrode in a schematic of each subject’s implant (rightmost column).

94 reported seeing two distinct shapes (e.g., Subject 1, Electrode D1). Mean images for each electrode  
95 were obtained by averaging the drawings across the five stimulation trials, aligned by their centers  
96 of mass (column ‘average’). Mean images were then centered over the corresponding electrode in  
97 a schematic of the subject’s implant to reveal the rich repertoire of elicited percepts across  
98 electrodes (large, rightmost panel in each subplot).

99 As is evident from these data, only a small number of phosphenes could be described as focal  
100 spots of light. Subject 1 drew percepts as either curved or straight lines, wedges, or relatively round  
101 spots. Subject 2 drew most percepts as ovals or relatively round spots with only a few curved or  
102 straight lines of varying thickness, whereas Subject 3 drew all phosphenes as slightly curved or  
103 straight, thin lines. Subject 4 predominantly drew ovals, wedges, and triangles, with only few  
104 curved or straight lines.

105 Interestingly, for Subjects 2–4 the percepts produced by electrodes in the first two rows of the  
106 array (i.e., Electrodes A1–F1, A2–F2) were much thinner and longer than for other electrodes  
107 (Beyeler, 2018; Mueller and Grill, 2013). It is possible that these electrodes were the ones that  
108 were closest to the retinal surface, since the surgical tack used to attach the implant to the retina  
109 was located next to the first row of electrodes. However, we did not have access to optical  
110 coherence tomography data, which would have allowed us to directly measure electrode-retina  
111 distance.

112 To quantify the similarity and variability of individual phosphene drawings, we calculated  
113 three shape descriptors for each collected drawing: phosphene *area*, *orientation*, and *elongation*  
114 (see Methods). These parameter-free metrics were based on a set of statistical quantities known as  
115 ‘image moments’; that is, particular weighted averages of pixel intensities across an image  
116 (Equation 1). Phosphene orientation and elongation were calculated from the eigenvalues and  
117 eigenvectors of each drawing’s covariance matrix (Equations 2 – 4).

118 The upper panels of **Figure 3** show distributions of phosphene *area* (**Figure 3A**), *orientation*  
119 (**Figure 3B**), and *elongation* (**Figure 3C**) for each subject, across all tested electrodes. The lower  
120 panel (**Figure 3D–F**) boxplots depicts trial-to-trial variability for each shape descriptor of a given  
121 electrode, measured as the standard error of the mean (SEM) calculated across drawings.

122 To assess whether observed SEM values were smaller than would be predicted from a random  
123 sample of phosphene drawings we performed a resampling analysis (1000 iterations). We began  
124 by calculating the SEM across all five drawings for each electrode. To assess whether, for an  
125 individual subject, drawings were more similar for an individual electrode than across other  
126 electrodes in that particular subjects’ array, resampling was done by randomly sampling (with  
127 replacement) phosphene drawings across all the electrodes of that subject. Probability values were  
128 estimated by comparing the mean SEM across electrodes of the real distribution to the 1-tailed  
129 confidence interval generated by resampling. Detailed results for each shape descriptor are given  
130 below.

### 131 2.1.1 Phosphene area estimates show consistent variation across electrodes

132 Phosphene *area* was calculated as the number of nonzero pixels in the drawing. We report data in  
133 terms of pixels because the relationship between drawing area and the size of the phosphene in  
134 terms of visual angle should be interpreted with caution. Based on each subject's viewing distance,  
135 the touchscreen should have subtended  $73.8 \times 73.8^\circ$  of visual angle for Subject 1,  $60 \times 45^\circ$  for  
136 Subject 2,  $65 \times 48.8^\circ$  for Subject 3, and  $64 \times 48^\circ$  for Subject 4. Although we asked subjects to  
137 draw phosphenes 'as if they appeared at arm's length' (see Methods), subjects qualitatively  
138 reported that phosphenes could appear as close as 'in front of their face' to 'at arm's length'. As  
139 can be seen by the variability in the boxplots in **Figure 3D**, estimates of area varied widely across  
140 both subjects and electrodes. However, despite the lack of a reference plane in depth, for all but  
141 S1 (marginally significant) the observed SEM values for phosphene area were significantly smaller  
142 than SEM values from randomly chosen electrodes (S1:  $p < 0.06$ , S2:  $p < 0.01$ , S3:  $p < 0.001$ ,  
143 S4:  $p < 0.001$ ). S1 had particularly small percepts, so areal variability may have been more  
144 heavily influenced by drawing error.

### 145 2.1.2 Phosphene orientation is more consistent within than across electrodes

146 Phosphene *orientation* was calculated as the angle of the principal eigenvector (in the range  $[-90^\circ$ ,  
147  $90^\circ]$ ). For all subjects, mean SEM values for phosphene orientation were significantly smaller than  
148 mean SEM values for our bootstrapped null model (S1:  $p < 0.001$ , S2:  $p < 0.001$ , S3:  $p < 0.001$ ,

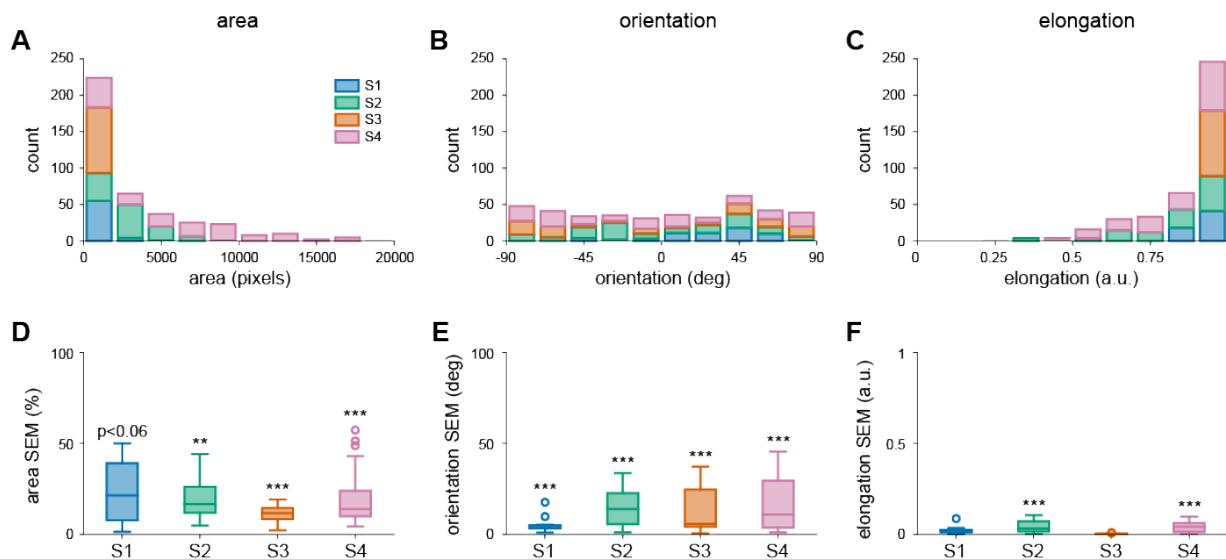

**Figure 3:** (A-C) Distribution of phosphene area, orientation, and elongation for each subject (Subject 1: 60 drawings, Subject 2: 110 drawings, Subject 3: 90 drawings, Subject 4: 140 drawings). (D-F) Distribution of the variability of shape descriptors for each subject, measured as the standard error of the mean (SEM) across trials for every electrode. Each box extended from the lower to upper quartile values of the data, with a line at the median. Whiskers extended from the fifth to ninety-fifth percentiles, with data points outside that range considered outliers ('o'). Area SEM for every electrode was normalized by the mean area of all drawings for that particular electrode.

149 S4:  $p < 0.001$ ), showing that the variation in phosphene orientation within an individual electrode  
150 is less than the variation across electrodes (**Figure 3E**).

### 151 **2.1.3 Phosphene elongation is more consistent within than across electrodes**

152 Phosphene *elongation* was calculated as the relative difference in magnitude of the eigenvalues  
153 and normalized to [0, 1], with 0 representing a circle, and 1 representing an infinitesimally thin  
154 line. The distribution of elongation values indicates that subjects consistently saw elongated  
155 percepts instead of focal spots of light, indeed Subject 3 reported exclusively seeing thin curved  
156 and straight lines. These results are in stark contrast to the prevailing assumption in the field that  
157 stimulating a single electrode should generate the percept of a small focal spot of light (Chen et  
158 al., 2009; Dagnelie et al., 2007; Freeman et al., 2011; Hayes et al., 2003; Thompson et al., 2003).

159 For Subjects S2 and S4, observed SEM values for phosphene elongation were significantly  
160 smaller than of our bootstrapped null model (S2:  $p < 0.001$ , S4:  $p < 0.001$ ). For Subjects S1 and  
161 S3 results were not significant; percepts were heavily elongated for every electrode, providing  
162 little variability in the dataset (**Figure 3F**).

### 163 **2.1.4 Drawing accuracy**

164 Our subjects had been lacking tactile-visual feedback for many years. This motivated a control  
165 experiment, where we asked subjects to explore various tactile targets (made of felt with a  
166 cardboard background) with their hands, and to draw the targets on a touch screen (**Figure S1**).  
167 Drawing errors in the tactile experiments were similar to those in our phosphene drawing  
168 experiments (**Figure S2**).

## 169 **2.2 Phosphene orientation is aligned with retinal nerve fiber bundles**

170 As described above, computational models and electrophysiological evidence from *in vitro*  
171 preparations of rat and rabbit retina suggest that retinal implants may stimulate passing axon fibers  
172 (Fried et al., 2009; Rizzo et al., 2003; Weitz et al., 2015). Retinal ganglion cells send their axons  
173 on highly stereotyped pathways *en route* to the optic nerve (**Figure 4A–C**). Because of this  
174 topographic organization, an electrode that stimulates nearby axonal fibers would be expected to  
175 antidromically activate cell bodies located peripheral to the point of stimulation. Perceptually,  
176 activating an axon fiber that passes under a stimulating electrode is indistinguishable from the  
177 percept that would be elicited by activating the corresponding ganglion cell *body*. The visual  
178 percept should appear in the spatial location in visual space for which the corresponding ganglion  
179 cell encodes information, which could be hundreds of microns away from the stimulation site (Fine  
180 and Boynton, 2015). Consequently, percepts elicited from axonal stimulation would be expected  
181 to appear elongated in the direction of the underlying nerve bundle trajectory (**Figure 4C**).

182 To test whether the orientation of phosphene drawings were aligned with the underlying nerve  
183 fiber bundles, we estimated the relative location and orientation of each subject's implant with  
184 respect to the fovea and the optic disc, using ophthalmic fundus photographs (**Figure 4D**; here  
185 shown for Subject 4). While yellow screening pigments allow for visualization of macular extent  
186 in normal eyes, it is difficult to discriminate the macula-periphery boundary in our subjects because  
187 of the characteristic pigmentary deposits associated with retinitis pigmentosa (Hartong et al.,  
188 2006). We therefore had a retina specialist mark the fovea on a fundus image obtained before  
189 surgery (**Figure 4D**, top), and subsequently used computer vision techniques (see Methods) to  
190 align the presurgery image with a second fundus image obtained after surgery (**Figure 4D**,  
191 bottom), showing the implant relative to the optic nerve head. This allowed us to estimate the array  
192 center with respect to the fovea, the array rotation with respect to the horizontal raphe, and the  
193 retinal distance between the fovea and the optic nerve head for each subject (**Figure 4E**). The

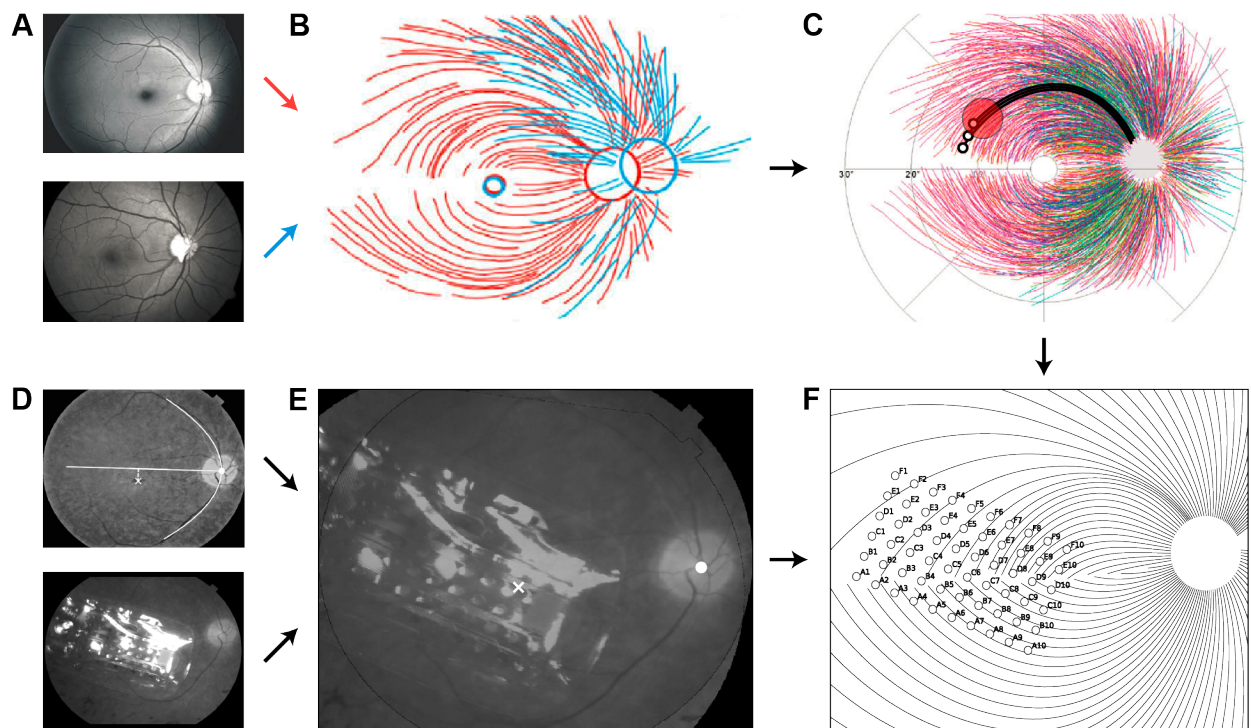

**Figure 4:** (A–C) The topographic organization of optic nerve fiber bundles is highly stereotyped in the human retina (adapted from Jansonius et al., 2009). Fundus images from 55 human eyes (A) were superimposed by translation in order to center the foveola (B), followed by rotation and zooming to align the centers of the optic disc (C). Electrical stimulation (red circle) of a nerve fiber bundle could antidromically activate ganglion cell bodies peripheral to the point of stimulation (small black circles), leading to percepts that appear elongated in the direction of the underlying nerve bundle trajectory. (D–E) The location and orientation of each subject's implant (Subject 4 shown here) was estimated by combining their postsurgical fundus photograph (D, bottom) with a baseline presurgical image in which the fovea had been identified (D, top) to produce a registered image (E; x: foveal pit, o: optic disc). The horizontal raphe (D, white line) was approximated by fitting a parabola to the main vascular arcade and finding the tangent to the parabola inflexion point. (F) The extracted landmarks were then used to place a simulated array on a simulated map of nerve fiber bundles.



194 resulting topographic measurements were then used to simulate a map of the ganglion axon  
195 pathways (Jansonius et al., 2009) that was tailored to each subject's retinal dimensions (**Figure**  
196 **4F**).

197 Remarkably, we found that for all subjects, phosphene orientation was well aligned with the  
198 tangent line of the nerve fiber bundle directly below the stimulating electrode (**Figure 5**). Here,  
199 insets show mean drawings for representative electrodes, from which phosphene orientation was  
200 calculated. This was not only true for line phosphenes, which resembled carbon copies of the  
201 underlying fiber bundle topography (e.g., Subject 1: D2, Subject 4: F2), but also for more compact  
202 phosphenes, which still tended to be elongated in the direction of the local fiber bundle trajectory  
203 (e.g., Subject 2: B9, Subject 4: C10).

204 To assess whether these angular errors were smaller than would be predicted from a random  
205 placement of the array on the retina, we performed a resampling analysis. First, we calculated the  
206 mean absolute angle between the five drawings corresponding to a single electrode and the tangent  
207 line of the closest nerve fiber bundle. We repeated this procedure for all electrodes in the array to  
208 produce a distribution of mean angular errors (box plots in **Figure 5**). Our resampled distribution  
209 (1000 iterations) was generated by randomly placing the array on the retina (array center

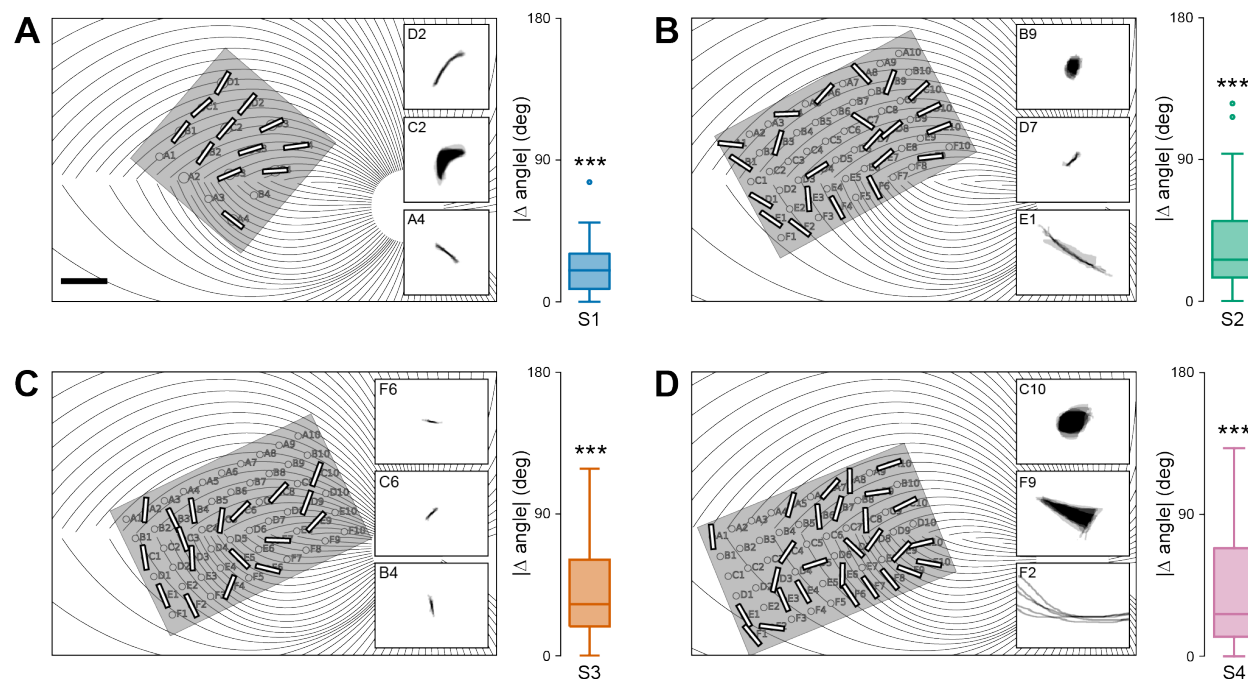

**Figure 5:** Phosphene orientations are aligned with retinal nerve fiber bundles. (**A–D**) Simulated map of nerve fiber bundles for Subjects 1–4 (scale bar: 1 mm). Phosphene orientation is indicated as oriented bars, overlaid over the corresponding electrode in the array. Insets show example percepts. Note that the maps are flipped upside down so that the upper image half corresponds to the upper visual field (inferior retina). Box plots indicate the distribution of mean absolute angular errors between phosphene orientation and the tangent line of the ganglion axon pathway nearest to the corresponding electrode. For all subjects, angular errors were significantly better than would be expected from random array placement.

210 coordinates:  $x \in [-30, 30]^\circ, y \in [-15, 15]^\circ$ . Probability values were estimated by comparing the  
211 mean angular error of the real distribution to the 1-tailed confidence interval of values from the  
212 resampled null model. Angular errors were significantly smaller than predicted by the null model  
213 in all four subjects (S1:  $p < 0.001$ , S2:  $p < 0.001$ , S3:  $p < 0.001$ , S4:  $p < 0.001$ ).

### 214 **2.3 Predicting phosphene shape based on a simulated map of ganglion axon pathways**

215 We then tested whether the spatial layout of ganglion axon pathways could account for phosphene  
216 shape as well as orientation. We assumed that the activation of an axon elicited a percept centered  
217 over the receptive field location of that axon's cell body. The activation sensitivity of a passing  
218 axon fiber was assumed to decay exponentially with retinal distance from the stimulation site, with  
219 each subject's data being fit with two parameters: a decay constant  $\lambda$ , which described activation  
220 sensitivity along the axon, and a decay constant  $\rho$ , which described sensitivity orthogonal to the  
221 axon (see Methods). This allowed us to generate a tissue activation map for each stimulating  
222 electrode, which we thresholded to arrive at a binary image that could serve as a prediction of a  
223 phosphene drawing (small schematic in the center column of **Figure 6**).

224 Alternatively, we considered a simpler but widely used model that treated each electrode in  
225 an array as a 'pixel' in an image, thus assuming that stimulating a grid of electrodes on the retina  
226 would result in the percept of a grid of isolated, focal spots of light (Chen et al., 2009; Dagnelie et  
227 al., 2007; Freeman et al., 2011; Hayes et al., 2003; Thompson et al., 2003). We refer to this model  
228 as the 'scoreboard model', because much like the large scoreboards found in sports stadiums, an  
229 image is created by an array of individual light sources that can be turned off or on. To implement  
230 the scoreboard model, we assumed that an electrode would lead to the percept of a Gaussian blob  
231 (with spatial decay constant  $\rho$ ). The resulting intensity profile was again thresholded to obtain a  
232 binary image, which was compared to real phosphene drawings (small schematic in the right  
233 column of **Figure 6**).

234 To find the parameter values under each model that best predicted phosphene shape, we  
235 constructed a cost function from the difference between predicted and observed phosphene area,  
236 orientation, and elongation, which we minimized using particle swarm optimization (see  
237 Methods). Because scoreboard and axon map models had a different number of parameters  
238 (scoreboard model:  $\rho$ ; axon map model:  $\rho, \lambda$ ), we used leave-one-electrode-out cross-validation to  
239 allow for fair model comparison, where we repeatedly fit each model to the drawings from all but  
240 one electrode in the array. Fitted parameter values were then used to predict the phosphene shapes  
241 of the held-out drawings. Note that a single value of  $\rho$  and  $\lambda$  was used to describe the drawings of  
242 all electrodes in that subject's array.

243 The result of this cross-validation procedure is shown in **Figure 6**. Here, ground-truth  
244 drawings are shown in the left column, and predicted phosphenes (on the test-fold of the cross-  
245 validation procedure) are shown in center and right columns. Thus, predicted phosphene shapes  
246 represent each model's ability to generalize to new electrodes. Whereas the axon map model was  
247 able to generate both compact and elongated phosphenes that span a range of geometrical shapes  
248 such as 'blobs', 'lines', and 'wedges', the scoreboard model exclusively predicted round  
249 phosphenes of various size.

250 The best fitting, cross-validated parameter values are given in **Table 1** (averaged across folds).  
251 Even though phosphene shape often varied drastically across electrodes, the axon map model

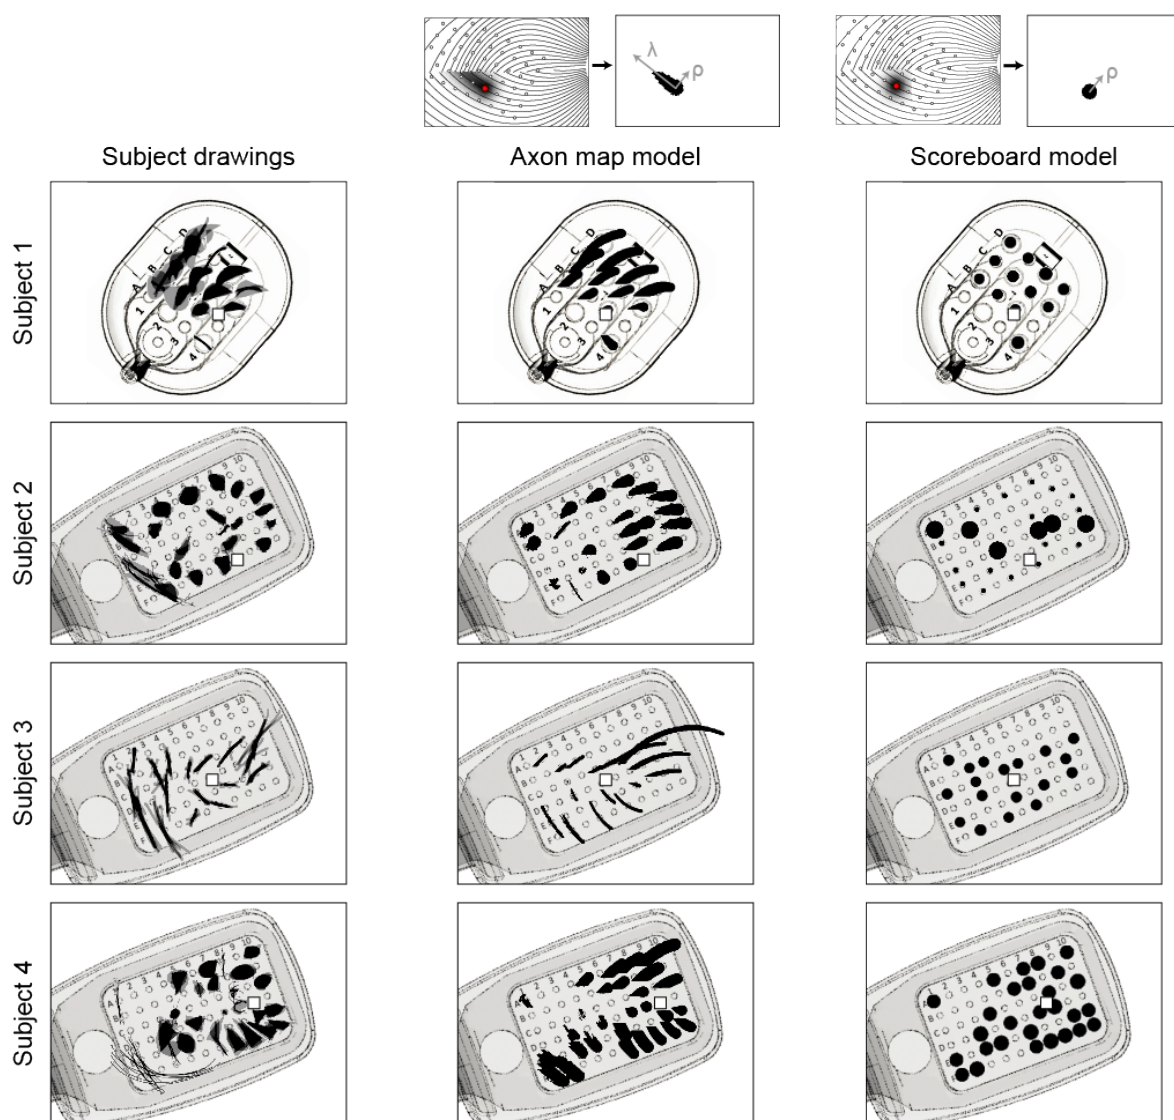

**Figure 6:** Phosphene drawings (left columns) contrasted against cross-validated phosphene predictions of the axon map model (center column) and the scoreboard model (right column), overlaid over a schematic of each subject's implant. Each predicted phosphene is from the test fold of a leave-one-electrode-out cross-validation.

252 recovered similar values for  $\rho$  and  $\lambda$  across different folds for a given subject, as indicated by  
 253 relatively small SEMs. Without adjusting for drawing bias, these results suggest that electrical  
 254 stimulation influences ganglion cells whose cell bodies are at a distance of approximately  $\rho=437$   
 255  $\mu\text{m}$  (corresponding to  $\sim 1.5^\circ$  of visual angle) orthogonal to the direction of the axon fiber bundle,  
 256 but as far as  $\lambda=1,420 \mu\text{m}$  (corresponding to  $\sim 5^\circ$  of visual angle) along a direction parallel to the  
 257 axon fiber.  
 258

| Subject ID | Axon map model           |                             | Scoreboard model         |
|------------|--------------------------|-----------------------------|--------------------------|
|            | $\rho$ ( $\mu\text{m}$ ) | $\lambda$ ( $\mu\text{m}$ ) | $\rho$ ( $\mu\text{m}$ ) |
| 1          | 410 $\pm$ 5              | 1190 $\pm$ 157              | 533 $\pm$ 11             |
| 2          | 315 $\pm$ 17             | 500 $\pm$ 142               | 244 $\pm$ 34             |
| 3          | 86 $\pm$ 3               | 992 $\pm$ 150               | 170 $\pm$ 1              |
| 4          | 437 $\pm$ 6              | 1420 $\pm$ 42               | 175 $\pm$ 1              |

259 **Table 1:** Cross-validated model parameter values, averaged across folds  $\pm$  uncorrected SE.

260  
 261 To further quantify model performance, we compared cross-validated prediction errors  
 262 (Equation 13) across axon map and scoreboard models, **Figure 7**. Here, each data point in the  
 263 scatter plots corresponds to the cross-validated prediction error (averaged across every drawing in  
 264 that fold) for each electrode. Data point almost always lie below the diagonal, indicating that the  
 265 axon map model was more accurate than the scoreboard model. Indeed, the axon map model often  
 266 improved cross-validated log prediction error by an order of magnitude (see insets), simply by  
 267 adding a single parameter  $\lambda$  that accounted for the current spread along axons of passage in the  
 268 optic nerve fiber layer of the retina.  
 269

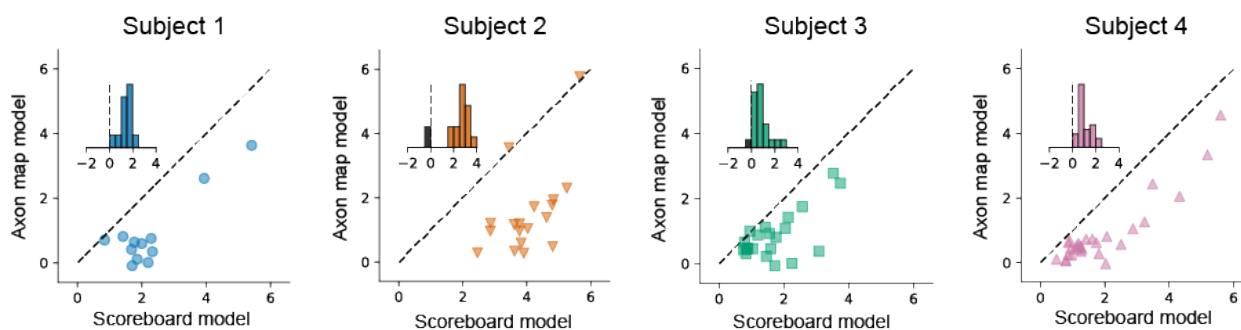

**Figure 7:** Comparison of log mean prediction error for the two models. Prediction error was based on the sum of differences between predicted and observed phosphene area, orientation, and elongation (see Equation 13). Each data point in the scatter plots corresponds to the cross-validated prediction error of all drawings associated with a particular held-out electrode. Prediction error was significantly higher for the scoreboard model compared to the axon map model (Subject 1:  $p < 0.001$ ,  $N=12$ ; Subject 2:  $p < 0.001$ ,  $N=22$ ; Subject 3:  $p < 0.001$ ,  $N=18$ ; Subject 4:  $p < 0.001$ ,  $N=28$ ; 2-tailed Wilcoxon signed-rank test). Insets in each panel show the histogram of pair-wise differences in log prediction error.

### 270 **3. Discussion**

271 We show here that the elicited percepts of patients with retinal implants can be accurately predicted  
272 using the spatial layout of ganglion axon pathways in the human retina. Model fits to behavioral  
273 data suggest that sensitivity to electrical stimulation is not confined to the axon initial segment  
274 (Fried et al., 2009), but can be modeled as falling off with different decay constants along the axon  
275 (with  $\lambda$  ranging from 500–1,420  $\mu\text{m}$ ) and orthogonally from the axon (with  $\rho$  ranging from 86–  
276 437  $\mu\text{m}$ ), resulting in visual percepts ranging from ‘blobs’ to ‘streaks’ and ‘wedges’ depending on  
277 both the relative values of  $\lambda$  and  $\rho$ , and the retinal location of the stimulating electrode. These  
278 results are in agreement with theoretical work suggesting an anisotropic spread of current in the  
279 retinal tissue (Esler et al., 2018) as well as previous animal literature demonstrating that epiretinal  
280 stimulation leads to activation of passing axon fibers (Fried et al., 2009; Grosberg et al., 2017;  
281 Rizzo et al., 2003; Weitz et al., 2015), which can severely distort the quality of the generated visual  
282 experience (Beyeler et al., 2017b; Fine and Boynton, 2015; Nanduri et al., 2008; Rattay and Resatz,  
283 2004; Rizzo et al., 2003). Our findings suggest that the spatial distortions reported by patients are  
284 not arbitrary, but rather depend on the topographic organization of optic nerve fiber bundles in  
285 each subject’s retina, which can be captured by a computational model. Having an accurate model  
286 that generalizes across patients is crucial for retinal prostheses to be able to generate more complex,  
287 perceptually intelligible percepts. Our results therefore open up the possibility for future devices  
288 to incorporate stimulation strategies that are tailored to the predicted perceptual experience of each  
289 individual patient, relying on the known surgical placement of the device and empirical estimates  
290 of  $\rho$  and  $\lambda$ .

#### 291 **3.1 A rich repertoire of phosphene shapes**

292 The phosphenes elicited by single-electrode stimulation vary dramatically across subjects and  
293 electrodes (**Figure 2**, **Figure 3A–C**), despite relatively small drawing errors and consistency in  
294 drawings within a given electrode (**Figure 3D–F**). These results are in agreement with the previous  
295 literature that has reported that patients subjectively report a variety of percept shapes (de Balthasar  
296 et al., 2008; Greenwald et al., 2009; Horsager et al., 2009; Nanduri et al., 2012), of which only a  
297 small fraction could be described as focal spots of light.

298 The variability in phosphene shape across subjects that we report (captured by variation in  $\lambda$   
299 and  $\rho$  across patients), might be due to a number of factors, a few of which are outlined below.  
300 First, diseases such as retinitis pigmentosa and macular degeneration are characterized by a  
301 progressive degeneration of photoreceptors, gradually affecting other layers of the retina  
302 (Humayun et al., 1999; Jones et al., 2003; Marc et al., 2003; Mazzoni et al., 2008). In severe end-  
303 stage retinitis pigmentosa, roughly 95% of photoreceptors, 20% of bipolar cells, and 70% of  
304 ganglion cells degenerate (Santos et al., 1997), so that little or no useful vision is retained. Disease  
305 progression therefore influences the relative proportion of surviving bipolar and ganglion cell  
306 types, which in turn is likely to influence phosphene shape.

307 Second, with a diameter of 200  $\mu\text{m}$ , each electrode in the Argus II array encompasses the  
308 equivalent area of hundreds of photoreceptors. A single electrode therefore inevitably leads to  
309 activation of a wide variety of morphologically and functionally distinct retinal cells (Dacey, 2004;  
310 Field and Chichilnisky, 2007), including simultaneous activation of both ON and OFF pathways.  
311 This is in contrast to natural stimulation, which precisely activates a number of specialized,  
312 functionally complementary, parallel processing pathways in the retina (for a recent review see  
313 Nassi and Callaway, 2009). Although epiretinal stimulation with relatively short pulses might  
314 primarily activate ganglion cells rather than bipolar cells (Freeman et al., 2010; Fried et al., 2006;  
315 Greenberg, 1998; Sekirnjak et al., 2006, 2008), there is still much to be learned about how the  
316 information from these different retinal representations are combined at later stages of processing  
317 to form a conscious percept.

318 Third, the mapping of retinal eccentricity to visual field coordinates is nonlinear. Because the  
319 foveola contains only photoreceptors, ganglion cell bodies are displaced centrifugally from their  
320 cone inputs by several degrees; an effect that extends out as far as  $17^\circ$  (Curcio and Allen, 1990;  
321 Watson, 2014).

322 Finally, phosphene size might be influenced by ganglion cell density and receptive field size.  
323 Whereas the receptive field size of retinal ganglion cells only gradually increases with eccentricity  
324 (Peichl and Wässle, 1979), ganglion cell density decreases rapidly (Curcio and Allen, 1990).  
325 Furthermore, retinal degeneration in retinitis pigmentosa tends to progress from the periphery to  
326 the macula, thereby having a greater effect on ganglion cell density in the periphery (Humayun et  
327 al., 1999; Santos et al., 1997; Stone et al., 1992). As a consequence, more peripheral electrodes  
328 would typically stimulate cells with only slightly larger receptive fields, but in much smaller  
329 numbers than in the fovea. These two conflicting effects may contribute to our finding of no  
330 correlation between phosphene area and retinal eccentricity (data not shown).

### 331 **3.2 Phosphene shape is mediated by axonal stimulation**

332 Despite the variability in phosphene shape, all subjects reported seeing elongated phosphenes on  
333 at least a subset of electrodes (**Figure 3C**). Although the electric field generated by a disk electrode  
334 is radially symmetric, the neural tissue induces anisotropies in the electric field, and stimulation of  
335 axon fibers produces even more striking anisotropies in patterns of neural activation within the  
336 retina (Esler et al., 2018). It has long been known that external stimulation of an axon induces an  
337 action potential that travels both backward to the cell body and forward to the synaptic terminals  
338 (Bishop et al., 1962; Lemon, 1984).

339 A number of studies have previously hypothesized that axonal stimulation could lead to  
340 phosphenes that are elongated in shape and poorly localized (e.g., Fine and Boynton, 2015).  
341 However, this idea has never been explicitly tested. In the present study we demonstrate that axonal  
342 stimulation in the retina leads to predictable distortions of shape in human patients, which can be  
343 captured by a computational model (**Figures 5–7**).

344 Axonal stimulation is a concern for other implant technologies as well. Although subretinal  
345 prostheses such as Alpha-IMS (Stingl et al., 2015) have electrodes in close proximity to bipolar  
346 cells, *in vitro* animal studies have found that subretinal stimulation with 1 ms pulses also directly  
347 activates retinal ganglion cells at thresholds statistically similar to those of inner retinal cells  
348 (Boinagrov et al., 2014; Eickenscheidt et al., 2012; Tsai et al., 2009). Similarly, axonal stimulation  
349 is expected to be an issue for cortical implants, since passing axons from neurons located in distant  
350 parts of the brain have been shown to be highly sensitive to electrical stimulation (Histed et al.,  
351 2009; Lee et al., 2016; Ranck, 1975).

352 Several recent studies have tried to identify stimulation protocols that minimize axonal  
353 activation, with mixed results. Whereas one *in vitro* study suggested using short-duration pulses  
354 ( $\leq 100 \mu\text{s}$ ) to avoid axonal stimulation (Jensen et al., 2005), another study did not see any benefits  
355 of short pulses, and instead suggested using long-duration pulses ( $\geq 25 \text{ ms}$ ) or low-frequency  
356 ( $< 25 \text{ Hz}$ ) sinusoidal stimulation (Weitz et al., 2015). One difficulty with these approaches is that  
357 they are likely to limit stimulation to a highly restricted amplitude and/or frequency range,  
358 potentially limiting the dynamic range available for the encoding of brightness (Greenwald et al.,  
359 2009; Nanduri et al., 2012).

360 We show here that percepts are highly consistent over time and can potentially be described  
361 using an anatomically detailed computational model with a small number of parameters. Thus, an  
362 alternative strategy might be to move away from thinking about artificial sight as a linear  
363 combination of ‘pixels’, and instead accept the perceptual distortions resulting from axonal  
364 stimulation as the fundamental building blocks of prosthetic vision.

365 **4. Acknowledgments**

366 Supported by the Washington Research Foundation Funds for Innovation in Neuroengineering and  
367 Data-Intensive Discovery (M.B.), by a grant from the Gordon and Betty Moore Foundation and  
368 the Alfred P. Sloan Foundation to the University of Washington eScience Institute Data Science  
369 Environment (M.B. and A.R.), and by the National Institutes of Health (NIH K99 EY-029329 to  
370 M.B., EY-12925 to G.M.B., and EY-014645 to I.F.). Research credits for cloud computing were  
371 provided by Amazon Web Services. The authors would like to thank retina specialists Drs. Aaron  
372 Y. Lee and Cecilia S. Lee in the Department of Ophthalmology at the University of Washington  
373 for locating the fovea in fundus photographs.

374 **5. Author contributions**

375 J.W., A.R., G.M.B., and I.F. designed the study. D.N. collected the data. M.B. and A.R. analyzed  
376 the data. M.B. wrote the software. M.B., D.N., and I.F. wrote the manuscript.

377 **6. Declaration of interests**

378 Authors M.B., JDW, A.R., G.M.B. and I.F. are collaborators with Second Sight Medical Products  
379 Inc., who develops, manufactures, and markets the Argus II Retinal Prosthesis System referenced  
380 within this article.



## 381 7. Methods

### 382 7.1 Subjects

383 Participants were four blind subjects (one female and three male) with severe retinitis pigmentosa,  
384 ranging from 45 to 70 years in age (**Table 2**). Subjects were chronically implanted with an  
385 epiretinal prosthesis as part of an FDA approved clinical trial (clinicaltrials.gov identifier for  
386 Subject 1: NCT00279500, completed; Subjects 2–4: NCT00407602, active). Surgeries were  
387 performed at the Doheny Eye Institute at the University of Southern California (Los Angeles, CA;  
388 Subject 1), at the Wilmer Eye Institute at Johns Hopkins School of Medicine (Baltimore, MD;  
389 Subject 2), at the Moorfields Eye Hospital (London, UK; Subject 3), and at the Royal Eye Hospital  
390 (Manchester, UK; Subject 4). None of the subjects had a recordable visual acuity prior to surgery,  
391 scoring worse than 2.9 logMAR (worse than 20/15,887) on a four-alternative forced-choice  
392 square-wave grating test (Ahuja et al., 2013; Caspi et al., 2009).

393 Due to their geographic location, Subjects 2 – 4 were not directly examined by the authors of  
394 this study. Instead, initial experimental procedures were sent to the clinical site, and trained field  
395 clinical engineers performed the experiments as specified. Raw collected data was then sent to the  
396 authors for subsequent analysis.

397 All tests were performed after obtaining informed consent under a protocol approved by the  
398 Institutional Review Board (IRB) at each subject’s location and under the principles of the  
399 Declaration of Helsinki.

400

| Subject ID | Second Sight ID | Clinical site                                                                   | Gender | Preoperative VA | Age at implantation | Years blind |
|------------|-----------------|---------------------------------------------------------------------------------|--------|-----------------|---------------------|-------------|
| 1          | TB              | Doheny Eye Institute,<br>University of Southern<br>California (Los Angeles, CA) | M      | NLP             | 55                  | 11          |
| 2          | 12-005          | Wilmer Eye Institute, Johns<br>Hopkins School of Medicine<br>(Baltimore, MD)    | M      | NLP             | 70                  | ?           |
| 3          | 51-009          | Moorfields Eye Hospital<br>(London, UK)                                         | F      | NLP             | 45                  | 15          |
| 4          | 52-001          | Royal Eye Hospital<br>(Manchester, UK)                                          | M      | BLP             | 50                  | 21          |

401 **Table 1:** Subject details. Columns 3-7 indicate the implant site, gender, preoperative visual acuity (VA) categorized  
402 as either bare light perception (BLP) or no light perception (NLP), the age at implantation, and the number of years  
403 participants had been blind prior to implantation (self-reported). Years blind for Subject 2 is unknown due to gradual  
404 loss of vision.

405

## 406 **7.2 Implant specification**

407 Subject 1 was implanted with a 16-channel microelectrode array (Argus I; Second Sight Medical  
408 Products, Inc., Sylmar, CA) consisting of 260 and 520  $\mu\text{m}$  diameter platinum disc electrodes,  
409 subtending  $0.9^\circ$  and  $1.8^\circ$  of visual angle, respectively. Electrodes were spaced 800  $\mu\text{m}$  apart, and  
410 arranged in a 4x4 alternating checkerboard pattern (**Figure 1A**). Subjects 2 – 4 were implanted  
411 with a 60-channel microelectrode array (Argus II; Second Sight Medical Products, Inc., Sylmar,  
412 CA) consisting of 200  $\mu\text{m}$  diameter platinum disc electrodes, each subtending  $0.7^\circ$  of visual angle.  
413 Electrodes were spaced 525  $\mu\text{m}$  apart, and arranged in a 6x10 grid (**Figure 1B**).

414 All stimuli described in this study were presented in ‘direct stimulation’ mode. Stimuli were  
415 programmed in Matlab using custom software, and pulse train parameters (the electrode(s) to be  
416 stimulated, current amplitude, pulse width, individual pulse duration, inter-pulse interval, and  
417 pulse train duration) were sent directly to an external visual processing unit (VPU), which was  
418 used to send stimulus commands to the internal portion of the implant using an inductive coil link  
419 (‘camera’ mode). The implanted receiver wirelessly received these data and sent the signals to the  
420 electrode array via a small cable.

421 In day-to-day use, an external unit consisting of a small camera and transmitter mounted on a  
422 pair of glasses is worn by the user. The camera captured video and sends the information to the  
423 VPU which converts it into pulse trains using pre-specified image processing techniques.

## 424 **7.3 Psychophysical methods**

425 Perceptual thresholds for individual electrodes were measured using an adaptive yes/no procedure  
426 implemented using custom software (see Supplemental Information). All presented stimuli were  
427 charge-balanced, square-wave, biphasic, cathodic-first pulse trains with fixed stimulus duration  
428 (Argus I: 500 ms, Argus II: 250 ms), current amplitude (set at 2x threshold), stimulus frequency  
429 (20 Hz) and pulse duration (0.45 ms/phase, no interphase delay).

430 Subjects were asked to perform a drawing task with a tactile target (Supplemental  
431 Information) or when their retina was electrically stimulated (**Figure 1**). In a given experimental  
432 run, a total of  $n$  stimulus conditions (either tactile or retinal stimulation) were tested. Each  
433 condition was repeated for  $m$  trials (for a total of  $mn$  trials per experimental run). Repeated trials  
434 of the same condition were randomized amongst other stimuli to confirm reproducibility of results.

435 Head movement of the Argus I subject was minimized with a chin rest. After each stimulus  
436 presentation, the subject traced the shape on a grid screen (containing 6 inch horizontal and vertical  
437 grid lines) with a center location aligned horizontally and vertically with the subject’s head.  
438 Drawing was carried out with a pen whose cap was a different color than its body. A head-mounted  
439 camera (Misumi CMOS S588-3T), located on the subject’s glasses, was used to record the trials  
440 to digital video recorder (DVR). Video files were analyzed off-line to extract shape data using  
441 custom built tracking software. In the first stage of processing, the entire image was rotated  
442 appropriately using the grid screen background as a reference. In the second stage, vertical and

443 horizontal gridlines, and the distance from the subject to screen were used to set a new coordinate  
444 system in visual angle coordinates (since the subject was 16 inches / 40.6 cm from the screen, 4  
445 gridlines = 70.0 cm corresponded to 73.8 degrees visual angle). In the third stage, the location of  
446 the pen cap was tracked (based on its color) across each frame of the video file. Finally, a binary  
447 shape data file was built from pen cap coordinate locations across all frames.

448 Argus II subjects were placed in a chair at a comfortable distance from a touch screen monitor  
449 with its center location aligned horizontally with the subject's head. The distance from each  
450 subject's eyes to the screen was recorded. After each stimulus presentation, the subject traced the  
451 shape on the monitor and the experimenter advanced to the next trial. Touch screen data were  
452 instantly recorded by custom software in 2D coordinates to a text file. Text files were analyzed  
453 offline to translate vector coordinates to a binary shape data file. The distance recorded from the  
454 subject to screen was used to set a new coordinate system in visual angle. Since Subjects 2 – 4  
455 were 33, 30.0, and 30.5 inches from the screen, this corresponded to a display size of 60, 65 and  
456 64 degrees of visual angle (horizontal screen length), respectively. After translating to the final  
457 visual angle coordinate system, the binary image was used in subsequent shape analyses.

## 458 7.4 Computational methods

### 459 7.4.1 Phosphene shape descriptors

460 Phosphene shape was quantified using three parameter-free shape descriptors commonly used in  
461 image processing: area, orientation, and elongation (Van der Walt et al., 2014). (Elongation is  
462 sometimes also referred to as eccentricity in the literature. We avoid that usage here to prevent  
463 confusion with retinal eccentricity). These descriptors are based on a set of statistical quantities  
464 known as 'image moments'. For an  $X \times Y$  pixel grayscale image,  $I(x, y)$ , where  $x \in [1, X]$  and  
465  $y \in [1, Y]$ , the raw image moments  $M_{ij}$  were calculated as:

$$M_{ij} = \sum_x \sum_y x^i y^j I(x, y). \quad (1)$$

466 Raw image moments were used to compute area ( $A = M_{00}$ ) and the center of mass ( $\bar{x}, \bar{y}$ ) =  
467 ( $M_{10}/M_{00}, M_{01}/M_{00}$ ) of each phosphene.

468 Phosphene orientation was calculated from the covariance matrix of an image:

$$\text{cov}[I(x, y)] = \begin{bmatrix} \mu'_{20} & \mu'_{11} \\ \mu'_{11} & \mu'_{02} \end{bmatrix}, \quad (2)$$

469 where  $\mu'_{20} = M_{20}/M_{00} - \bar{x}^2$ ,  $\mu'_{11} = M_{11}/M_{00} - \bar{x}\bar{y}$ , and  $\mu'_{02} = M_{02}/M_{00} - \bar{y}^2$ . The eigenvectors  
470 of this matrix corresponded to the major and minor axes of the image intensity. Orientation ( $\theta$ )  
471 could thus be extracted from the angle of the eigenvector associated with the largest eigenvalue  
472 towards the axis closest to this eigenvector:

$$\theta = \frac{1}{2} \arctan \left( \frac{2\mu'_{11}}{\mu'_{20} - \mu'_{02}} \right), \quad (3)$$

473 which was valid as long as  $\mu'_{20} \neq \mu'_{02}$ , with  $\theta \in \{-\pi/2, \pi/2\}$ . To avoid division by zero, we  
474 manually assigned an angle of  $\theta = 0$  whenever  $\mu'_{20}$  was equal to  $\mu'_{02}$ .

475 Phosphene elongation ( $E$ ) was calculated from the eigenvectors of the covariance matrix of  
476 Equation (2):

$$E = \sqrt{1 - \frac{\lambda_2}{\lambda_1}}, \quad (4)$$

477 where  $\lambda_{1,2} = (\mu'_{20} + \mu'_{02})/2 \pm \sqrt{4\mu'_{11}{}^2 + (\mu'_{20} - \mu'_{02})^2}/2$ , and  $E \in [0, 1]$ . An elongation of  $E =$   
478 1 represents a circle, and  $E = 0$  represents an infinitesimally thin line.

#### 479 7.4.2 Determination of implant location using fundus photography

480 Implant location was estimated by analyzing stereoscopic color fundus photographs obtained using  
481 systems available at each clinical site. For each subject, we performed the following procedure:

- 482 1. Extract landmarks: On a baseline fundus photograph (before surgery), a retina specialist  
483 marked the foveal pit and the center of the optic nerve head. On the most recent fundus  
484 photograph (after surgery), we marked the center of the implant.
- 485 2. Combine baseline image with implant image: We performed image registration using feature  
486 matching to bring the two images into the same coordinate system.
- 487 3. Adjust for magnification: Pixel distances were converted to retinal distances by using the  
488 known electrode-electrode spacing (Argus I: 800  $\mu\text{m}$ , Argus II: 525  $\mu\text{m}$ ).
- 489 4. Adjust for rotation: We approximated the horizontal raphe by fitting a parabola to the main  
490 vascular arcade, assuming that the center of the optic nerve head lied at the vertex of the  
491 parabola, and that the raphe was parallel to the parabola's axis of symmetry (Chin et al., 2013;  
492 Tobin et al., 2007).
- 493 5. Coordinate transform: The registered image was rotated so that the horizontal raphe came to  
494 lie on the abscissa, and the foveal pit at the origin of the new coordinate system. We located  
495 the coordinates of the center of the optic nerve head as well as the center of the array (from  
496 Step 1) in this new coordinate system. Retinal distances ( $\mu\text{m}$ ) were related to eccentricity (deg)  
497 using a formula that computes the relationship between retinal arc lengths and visual angles  
498 from based on the optic axis (Watson, 2014).
- 499 6. The extracted landmarks were then used to place a simulated array on a simulated map of  
500 ganglion axon pathways using the pulse2percept software (Beyeler et al., 2017a).

501 This procedure allowed us to estimate each subject's array location and orientation with respect to  
502 the fovea (**Table 3**). Based on fundus photographs of 104 sighted humans (Rohrschneider, 2004),  
503 the center of the optic disc was expected to be located at  $15.5^\circ \pm 1.1^\circ$  nasal,  $1.5^\circ \pm 0.9^\circ$  superior  
504 with respect to the fovea. For all four subjects, the estimated center of the optic disk was within  
505 two standard deviations of these expected values.

| Subject ID | Array center (x, y; $\mu\text{m}$ ) | Array rotation (deg) | Optic disc center (x, y; deg) |
|------------|-------------------------------------|----------------------|-------------------------------|
| 1          | (-651, -707)                        | -49.3                | (14.0, 2.40)                  |
| 2          | (-1331, -850)                       | -28.4                | (16.2, 1.38)                  |
| 3          | (-467, 206)                         | -25.8                | (14.0, 1.24)                  |
| 4          | (-1807, 401)                        | -22.1                | (16.3, 2.37)                  |

506 **Table 2:** Estimated locations of the implant and optic disc with respect to the fovea located at (0, 0) using fundus  
507 photography. Array rotation was measured with respect to the horizontal raphe.

508

### 509 7.4.3 Scoreboard model

510 The scoreboard model assumed that electrical stimulation led to the percept of focal dots of light,  
511 centered over the visual field location associated with the stimulated retinal field  
512 location  $(x_{\text{stim}}, y_{\text{stim}})$ , whose spatial intensity profile decayed with a Gaussian profile (Hayes et  
513 al., 2003; Thompson et al., 2003):

$$I_{\text{score}}(x, y; \rho) = \exp\left(-\frac{(x - x_{\text{stim}})^2 + (y - y_{\text{stim}})^2}{2\rho^2}\right), \quad (5)$$

514 where  $\rho$  was the spatial decay constant.

515 The resulting intensity profile  $I_{\text{score}}(x, y; \rho)$  was then thresholded to obtain a binary image.  
516 The threshold was chosen as  $1/\sqrt{e}$ , such that points closer than  $\rho$  to  $(x_{\text{stim}}, y_{\text{stim}})$  were assigned  
517 a value of 1, and all other points were assigned a value of 0.

### 518 7.4.4 Axon map model

519 Following Jansonius et al. (2009), we assumed that the trajectories of the optic nerve fibers could  
520 be described in a modified polar coordinate system  $(r, \phi)$  with its origin located in the center of  
521 the optic disc. A nerve fiber was modeled as a spiral:

$$\phi(r, \phi_0) = \phi_0 + b(r, \phi_0)(r - r_0)^{c(r, \phi_0)}, \quad (6)$$

522 where  $\phi_0 = \phi(r = r_0)$  is the angular position of the trajectory at its starting point at a circle with  
523 radius  $r_0$  around the center of the optic disc,  $b$  a real number describing the curvature of the spiral,

$$b(\phi_0, r) = \begin{cases} \exp\left(-1.9 + 3.9 \tanh\left(\frac{-(\phi_0 - 121)}{14}\right)\right), & r \geq 0 \\ -\exp\left(0.7 + 1.5 \tanh\left(\frac{-(-\phi_0 - 90)}{25}\right)\right), & r < 0, \end{cases} \quad (7)$$

524 and  $c$  a positive real number describing the location of the point of maximal curvature,

$$c(\phi_0, r) = \begin{cases} 1.9 + 1.4 \tanh\left(\frac{\phi_0 - 121}{14}\right), & r \geq 0 \\ 1.0 + 0.5 \tanh\left(\frac{-\phi_0 - 90}{25}\right), & r < 0. \end{cases} \quad (8)$$

525 Jansonius and colleagues determined parameter values by fitting Equations (6–8) to the  
526 topographical layout of 55 eyes from 55 human subjects (for details see Jansonius et al., 2009).

527 The attentive reader might notice that Equation (8) above fixes a typo in Equation (3) of Jansonius  
528 et al. (2009): The tanh numerator should indeed read  $\phi_0 - 121$ , not  $-(\phi_0 - 121)$ .

529 To apply the axon map to the eyes of our subjects, we first transformed the original coordinate  
530 system  $(r, \phi)$  to Cartesian coordinates  $(x, y)$  with the foveal pit located at  $(0, 0)$ , and then set the  
531 coordinates of the optic disc  $(x_{\text{od}}, y_{\text{od}})$  to the values estimated from fundus photography (**Table**  
532 **3**). The resulting axon maps for each subject can be seen in **Figure 4**.

533 An axon's sensitivity to electrical stimulation was assumed to decay exponentially with  
534 distance from the soma  $(x_{\text{soma}}, y_{\text{soma}})$ :

$$I_{\text{axon}}(x, y; \rho, \lambda) = I_{\text{score}}(x, y; \rho) \exp\left(-\frac{(x - x_{\text{soma}})^2 + (y - y_{\text{soma}})^2}{2\lambda^2}\right), \quad (9)$$

535 where  $\lambda$  was the spatial decay constant along the axon.  $I_{\text{score}}(x, y; \rho)$  is the same as in Equation  
536 (5) and is parameterized by a single parameter,  $\rho$ . As in the scoreboard model, the resulting  
537 intensity profile  $I_{\text{axon}}(x, y; \rho, \lambda)$  was thresholded to obtain a binary image.

#### 538 **7.4.5 Model fitting and evaluation**

539 To fit the scoreboard and axon map models to subject drawings, we first calculated the coefficient  
540 of determination ( $R^2$ ) from the predicted binary images and the corresponding ground-truth subject  
541 drawings.  $R^2$  was calculated from the ratio of the residual sum of squares ( $SS_{\text{res}}$ ) and the total sum  
542 of squares ( $SS_{\text{tot}}$ ) for each shape descriptor (area, orientation, or elongation):

$$R^2 = 1 - \frac{SS_{\text{res}}}{SS_{\text{tot}}}, \quad (10)$$

$$SS_{\text{res}} = \sum_i (s_i - \hat{s}_i)^2, \quad (11)$$

$$SS_{\text{tot}} = \sum_i (s_i - \bar{s})^2, \quad (12)$$

543 where  $s_i$  was the shape descriptor for the  $i$ -th ground-truth image,  $\hat{s}_i$  was the shape descriptor for  
544 the  $i$ -th predicted image, and  $\bar{s}$  was the mean of the shape descriptor averaged over all images. The  
545 three quantities  $R_{\text{area}}^2$ ,  $R_{\text{orientation}}^2$ , and  $R_{\text{elongation}}^2$  resulting from this procedure were then  
546 combined to construct a cost function that could be iteratively minimized:

$$c = \sum_d 1 - R_d^2, \quad (13)$$

547 where  $d = \{\text{area, orientation, elongation}\}$ . Due to the nonconvexity of this optimization problem,  
548 we minimized the cost function using particle swarm optimization (Kennedy and Eberhart, 1995).  
549 We set the swarm size at ten times the number of parameters (Storn, 1996). We ran every fitting  
550 procedure five times with different, randomly chosen initial conditions, and then chose the best  
551 run in subsequent analyses.

552 To allow for a fair performance comparison despite the scoreboard and axon map models  
553 having different numbers of parameters, we implemented a leave-one-electrode-out cross-  
554 validation procedure, where we repeatedly fit each model to the drawings from all but one  
555 electrode in the array. This is equivalent to calculating the Akaike Information Criterion that takes  
556 into account the difference in number of parameters (Stone, 1977). The fitted parameter values  
557 were then used to predict the shape descriptors of the held-out drawings (**Figure 13**). Note that a  
558 single value of  $\rho$  and  $\lambda$  was fitted for each subjects, and then used for all electrodes in that subject's  
559 array.

## 560 **7.5 Data and software availability**

561 Data are available on the Open Science Framework (doi:10.17605/osf.io/dw9nz). The software  
562 used for analyses was based on the pulse2percept Python package (Beyeler et al., 2017a). Scripts  
563 used to fit the scoreboard and axon map models, to analyze the data, and to produce the figures in  
564 the paper are available on GitHub (<https://github.com/VisCog/ArgusShapes.git>, v0.1).

565

## 566 8. References

- 567 Ahuja, A.K., Yeoh, J., Dorn, J.D., Caspi, A., Wuyyuru, V., McMahon, M.J., Humayun, M.S.,  
568 Greenberg, R.J., and Dacruz, L. (2013). Factors Affecting Perceptual Threshold in Argus II Retinal  
569 Prosthesis Subjects. *Transl Vis Sci Technol* 2, 1.
- 570 Beyeler, M. (2018). Biophysical model of axonal stimulation in epiretinal visual prostheses.  
571 *bioRxiv* 424622.
- 572 Beyeler, M., Boynton, G.M., Fine, I., and Rokem, A. (2017a). pulse2percept: A Python-based  
573 simulation framework for bionic vision. In *Proceedings of the 16th Python in Science Conference*,  
574 K. Huff, D. Lippa, D. Niederhut, and M. Pacer, eds. (Austin, TX), pp. 81-88.
- 575 Beyeler, M., Rokem, A., Boynton, G.M., and Fine, I. (2017b). Learning to see again:  
576 biological constraints on cortical plasticity and the implications for sight restoration technologies.  
577 *J Neural Eng* 14, 051003.
- 578 Bishop, P.O., Burke, W., and Davis, R. (1962). Single-unit recording from antidromically  
579 activated optic radiation neurones. *The Journal of physiology* 162, 432-450.
- 580 Boinagrov, D., Pangratz-Fuehrer, S., Goetz, G., and Palanker, D. (2014). Selectivity of direct  
581 and network-mediated stimulation of the retinal ganglion cells with epi-, sub- and intraretinal  
582 electrodes. *J Neural Eng* 11, 026008.
- 583 Caspi, A., Dorn, J.D., McClure, K.H., Humayun, M.S., Greenberg, R.J., and McMahon, M.J.  
584 (2009). Feasibility study of a retinal prosthesis: spatial vision with a 16-electrode implant. *Arch*  
585 *Ophthalmol* 127, 398-401.
- 586 Chader, G.J., and Young, M. (2016). Preface: Sight Restoration Through Stem Cell Therapy.  
587 *Invest Ophthalmol Vis Sci* 57, ORSFa1-5.
- 588 Chen, S.C., Suaning, G.J., Morley, J.W., and Lovell, N.H. (2009). Simulating prosthetic  
589 vision: I. Visual models of phosphenes. *Vision Res* 49, 1493-1506.
- 590 Chin, K.S., Trucco, E., Tan, L., and Wilson, P.J. (2013). Automatic fovea location in retinal  
591 images using anatomical priors and vessel density. *Pattern Recognition Letters* 34, 1152-1158.
- 592 Curcio, C.A., and Allen, K.A. (1990). Topography of ganglion cells in human retina. *The*  
593 *Journal of comparative neurology* 300, 5-25.
- 594 da Cruz, L., Coley, B.F., Dorn, J., Merlini, F., Filley, E., Christopher, P., Chen, F.K.,  
595 Wuyyuru, V., Sahel, J., Stanga, P., *et al.* (2013). The Argus II epiretinal prosthesis system allows  
596 letter and word reading and long-term function in patients with profound vision loss. *Br J*  
597 *Ophthalmol* 97, 632-636.



598 da Cruz, L., Dorn, J.D., Humayun, M.S., Dagnelie, G., Handa, J., Barale, P.O., Sahel, J.A.,  
599 Stanga, P.E., Hafezi, F., Safran, A.B., *et al.* (2016). Five-Year Safety and Performance Results  
600 from the Argus II Retinal Prosthesis System Clinical Trial. *Ophthalmology*.

601 da Cruz, L., Fynes, K., Georgiadis, O., Kerby, J., Luo, Y.H., Ahmado, A., Vernon, A., Daniels,  
602 J.T., Nommiste, B., Hasan, S.M., *et al.* (2018). Phase 1 clinical study of an embryonic stem cell-  
603 derived retinal pigment epithelium patch in age-related macular degeneration. *Nat Biotechnol*.

604 Dacey, D. (2004). 20 Origins of Perception: Retinal Ganglion Cell Diversity and the Creation  
605 of Parallel Visual Pathways. In *The Cognitive Neurosciences Iii*, M.S. Gazzaniga, ed. (MIT Press),  
606 p. 281.

607 Dagnelie, G., Keane, P., Narla, V., Yang, L., Weiland, J., and Humayun, M. (2007). Real and  
608 virtual mobility performance in simulated prosthetic vision. *J Neural Eng* 4, S92-101.

609 de Balthasar, C., Patel, S., Roy, A., Freda, R., Greenwald, S., Horsager, A., Mahadevappa,  
610 M., Yanai, D., McMahon, M.J., Humayun, M.S., *et al.* (2008). Factors affecting perceptual  
611 thresholds in epiretinal prostheses. *Invest Ophthalmol Vis Sci* 49, 2303-2314.

612 Eickenscheidt, M., Jenkner, M., Thewes, R., Fromherz, P., and Zeck, G. (2012). Electrical  
613 stimulation of retinal neurons in epiretinal and subretinal configuration using a multicapacitor  
614 array. *J Neurophysiol* 107, 2742-2755.

615 Esler, T.B., Kerr, R.R., Tahayori, B., Grayden, D.B., Meffin, H., and Burkitt, A.N. (2018).  
616 Minimizing activation of overlying axons with epiretinal stimulation: The role of fiber orientation  
617 and electrode configuration. *PLoS One* 13, e0193598.

618 Field, G.D., and Chichilnisky, E.J. (2007). Information processing in the primate retina:  
619 circuitry and coding. *Annu Rev Neurosci* 30, 1-30.

620 Fine, I., and Boynton, G.M. (2015). Pulse trains to percepts: the challenge of creating a  
621 perceptually intelligible world with sight recovery technologies. *Philosophical transactions of the*  
622 *Royal Society of London Series B, Biological sciences* 370, 20140208.

623 Fine, I., Cepko, C.L., and Landy, M.S. (2015). Vision research special issue: Sight restoration:  
624 Prosthetics, optogenetics and gene therapy. *Vision Res* 111, 115-123.

625 Freeman, D.K., Eddington, D.K., Rizzo, J.F., 3rd, and Fried, S.I. (2010). Selective activation  
626 of neuronal targets with sinusoidal electric stimulation. *J Neurophysiol* 104, 2778-2791.

627 Freeman, D.K., Rizzo, J.F., 3rd, and Fried, S.I. (2011). Encoding visual information in retinal  
628 ganglion cells with prosthetic stimulation. *J Neural Eng* 8, 035005.

- 629 Fried, S.I., Hsueh, H.A., and Werblin, F.S. (2006). A method for generating precise temporal  
630 patterns of retinal spiking using prosthetic stimulation. *J Neurophysiol* 95, 970-978.
- 631 Fried, S.I., Lasker, A.C.W., Desai, N.J., Eddington, D.K., and Rizzo, J.F. (2009). Axonal  
632 Sodium-Channel Bands Shape the Response to Electric Stimulation in Retinal Ganglion Cells. *J*  
633 *Neurophysiol* 101, 1972-1987.
- 634 Gaub, B.M., Berry, M.H., Holt, A.E., Isacoff, E.Y., and Flannery, J.G. (2015). Optogenetic  
635 Vision Restoration Using Rhodopsin for Enhanced Sensitivity. *Mol Ther* 23, 1562-1571.
- 636 Greenberg, R.J. (1998). Analysis of electrical stimulation of the vertebrate retina: Work  
637 towards a retinal prosthesis. (Baltimore, Johns Hopkins University).
- 638 Greenwald, S.H., Horsager, A., Humayun, M.S., Greenberg, R.J., McMahon, M.J., and Fine,  
639 I. (2009). Brightness as a function of current amplitude in human retinal electrical stimulation.  
640 *Invest Ophthalmol Vis Sci* 50, 5017-5025.
- 641 Grosberg, L.E., Ganesan, K., Goetz, G.A., Madugula, S.S., Bhaskhar, N., Fan, V., Li, P.,  
642 Hottowy, P., Dabrowski, W., Sher, A., *et al.* (2017). Activation of ganglion cells and axon bundles  
643 using epiretinal electrical stimulation. *J Neurophysiol* 118, 1457-1471.
- 644 Hartong, D.T., Berson, E.L., and Dryja, T.P. (2006). Retinitis pigmentosa. *Lancet* 368, 1795-  
645 1809.
- 646 Hayes, J.S., Yin, V.T., Piyathaisere, D., Weiland, J.D., Humayun, M.S., and Dagnelie, G.  
647 (2003). Visually guided performance of simple tasks using simulated prosthetic vision. *Artif*  
648 *Organs* 27, 1016-1028.
- 649 Histed, M.H., Bonin, V., and Reid, R.C. (2009). Direct activation of sparse, distributed  
650 populations of cortical neurons by electrical microstimulation. *Neuron* 63, 508-522.
- 651 Horsager, A., Boynton, G.M., Greenberg, R.J., and Fine, I. (2011). Temporal interactions  
652 during paired-electrode stimulation in two retinal prosthesis subjects. *Invest Ophthalmol Vis Sci*  
653 52, 549-557.
- 654 Horsager, A., Greenberg, R.J., and Fine, I. (2010). Spatiotemporal interactions in retinal  
655 prosthesis subjects. *Invest Ophthalmol Vis Sci* 51, 1223-1233.
- 656 Horsager, A., Greenwald, S.H., Weiland, J.D., Humayun, M.S., Greenberg, R.J., McMahon,  
657 M.J., Boynton, G.M., and Fine, I. (2009). Predicting visual sensitivity in retinal prosthesis patients.  
658 *Invest Ophthalmol Vis Sci* 50, 1483-1491.

659 Humayun, M.S., Dorn, J.D., da Cruz, L., Dagnelie, G., Sahel, J.A., Stanga, P.E., Cideciyan,  
660 A.V., Duncan, J.L., Elliott, D., Filley, E., *et al.* (2012). Interim results from the international trial  
661 of Second Sight's visual prosthesis. *Ophthalmology* 119, 779-788.

662 Humayun, M.S., Prince, M., de Juan, E., Jr., Barron, Y., Moskowitz, M., Klock, I.B., and  
663 Milam, A.H. (1999). Morphometric analysis of the extramacular retina from postmortem eyes with  
664 retinitis pigmentosa. *Invest Ophthalmol Vis Sci* 40, 143-148.

665 Jager, R.D., Mieler, W.F., and Miller, J.W. (2008). Age-related macular degeneration. *N Engl*  
666 *J Med* 358, 2606-2617.

667 Jansonius, N.M., Nevalainen, J., Selig, B., Zangwill, L.M., Sample, P.A., Budde, W.M.,  
668 Jonas, J.B., Lagreze, W.A., Airaksinen, P.J., Vonthein, R., *et al.* (2009). A mathematical  
669 description of nerve fiber bundle trajectories and their variability in the human retina. *Vision Res*  
670 49, 2157-2163.

671 Jensen, R.J., Ziv, O.R., and Rizzo, J.F., 3rd (2005). Thresholds for activation of rabbit retinal  
672 ganglion cells with relatively large, extracellular microelectrodes. *Invest Ophthalmol Vis Sci* 46,  
673 1486-1496.

674 Jones, B.W., Watt, C.B., Frederick, J.M., Baehr, W., Chen, C.K., Levine, E.M., Milam, A.H.,  
675 Lavail, M.M., and Marc, R.E. (2003). Retinal remodeling triggered by photoreceptor  
676 degenerations. *The Journal of comparative neurology* 464, 1-16.

677 Kennedy, J., and Eberhart, R.C. (1995). Particle swarm optimization. In *IEEE International*  
678 *Conference on Neural Networks* (Perth, Australia), pp. 1942-1948.

679 Lee, S.W., Fallegger, F., Casse, B.D., and Fried, S.I. (2016). Implantable microcoils for  
680 intracortical magnetic stimulation. *Sci Adv* 2, e1600889.

681 Lemon, R. (1984). *Methods for neuronal recording in conscious animals* (New York: John  
682 Wiley and Sons).

683 Lorach, H., Goetz, G., Smith, R., Lei, X., Mandel, Y., Kamins, T., Mathieson, K., Huie, P.,  
684 Harris, J., Sher, A., and Palanker, D. (2015). Photovoltaic restoration of sight with high visual  
685 acuity. *Nat Med* 21, 476-482.

686 Luo, Y.H., Zhong, J.J., Clemo, M., and da Cruz, L. (2016). Long-term Repeatability and  
687 Reproducibility of Phosphene Characteristics in Chronically Implanted Argus(R) II Retinal  
688 Prosthesis Subjects. *Am J Ophthalmol*.

689 Marc, R.E., and Jones, B.W. (2003). Retinal remodeling in inherited photoreceptor  
690 degenerations. *Mol Neurobiol* 28, 139-147.

- 691 Marc, R.E., Jones, B.W., Watt, C.B., and Strettoi, E. (2003). Neural remodeling in retinal  
692 degeneration. *Prog Retin Eye Res* 22, 607-655.
- 693 Mazzoni, F., Novelli, E., and Strettoi, E. (2008). Retinal ganglion cells survive and maintain  
694 normal dendritic morphology in a mouse model of inherited photoreceptor degeneration. *J*  
695 *Neurosci* 28, 14282-14292.
- 696 Mueller, J.K., and Grill, W.M. (2013). Model-based analysis of multiple electrode array  
697 stimulation for epiretinal visual prostheses. *J Neural Eng* 10, 036002.
- 698 Nanduri, D., Fine, I., Horsager, A., Boynton, G.M., Humayun, M.S., Greenberg, R.J., and  
699 Weiland, J.D. (2012). Frequency and amplitude modulation have different effects on the percepts  
700 elicited by retinal stimulation. *Invest Ophthalmol Vis Sci* 53, 205-214.
- 701 Nanduri, D., Humayun, M.S., Greenberg, R.J., McMahon, M.J., and Weiland, J.D. (2008).  
702 Retinal prosthesis phosphene shape analysis. In 2008 30th Annual International Conference of the  
703 IEEE Engineering in Medicine and Biology Society, pp. 1785-1788.
- 704 Nassi, J.J., and Callaway, E.M. (2009). Parallel processing strategies of the primate visual  
705 system. *Nat Rev Neurosci* 10, 360-372.
- 706 Peichl, L., and Wassle, H. (1979). Size, scatter and coverage of ganglion cell receptive field  
707 centres in the cat retina. *The Journal of physiology* 291, 117-141.
- 708 Pérez Fornos, A., Sommerhalder, J., da Cruz, L., Sahel, J.A., Mohand-Said, S., Hafezi, F., and  
709 Pelizzone, M. (2012). Temporal Properties of Visual Perception on Electrical Stimulation of the  
710 Retina. *Investigative Ophthalmology & Visual Science* 53, 2720-2731.
- 711 Ranck, J.B., Jr. (1975). Which elements are excited in electrical stimulation of mammalian  
712 central nervous system: a review. *Brain research* 98, 417-440.
- 713 Rattay, F., and Resatz, S. (2004). Effective electrode configuration for selective stimulation  
714 with inner eye prostheses. *IEEE Trans Biomed Eng* 51, 1659-1664.
- 715 Rizzo, J.F., 3rd, Wyatt, J., Loewenstein, J., Kelly, S., and Shire, D. (2003). Perceptual efficacy  
716 of electrical stimulation of human retina with a microelectrode array during short-term surgical  
717 trials. *Invest Ophthalmol Vis Sci* 44, 5362-5369.
- 718 Rizzo, S., Belting, C., Cinelli, L., Allegrini, L., Genovesi-Ebert, F., Barca, F., and di Bartolo,  
719 E. (2014). The Argus II Retinal Prosthesis: 12-month outcomes from a single-study center. *Am J*  
720 *Ophthalmol* 157, 1282-1290.
- 721 Rohrschneider, K. (2004). Determination of the location of the fovea on the fundus. *Invest*  
722 *Ophthalmol Vis Sci* 45, 3257-3258.

723 Santos, A., Humayun, M.S., de Juan, E., Jr., Greenburg, R.J., Marsh, M.J., Klock, I.B., and  
724 Milam, A.H. (1997). Preservation of the inner retina in retinitis pigmentosa. A morphometric  
725 analysis. *Arch Ophthalmol* 115, 511-515.

726 Sekirnjak, C., Hottowy, P., Sher, A., Dabrowski, W., Litke, A.M., and Chichilnisky, E.J.  
727 (2006). Electrical stimulation of mammalian retinal ganglion cells with multielectrode arrays. *J*  
728 *Neurophysiol* 95, 3311-3327.

729 Sekirnjak, C., Hottowy, P., Sher, A., Dabrowski, W., Litke, A.M., and Chichilnisky, E.J.  
730 (2008). High-resolution electrical stimulation of primate retina for epiretinal implant design. *J*  
731 *Neurosci* 28, 4446-4456.

732 Stingl, K., Bartz-Schmidt, K.U., Besch, D., Chee, C.K., Cottrill, C.L., Gekeler, F., Groppe,  
733 M., Jackson, T.L., MacLaren, R.E., Koitschev, A., *et al.* (2015). Subretinal Visual Implant Alpha  
734 IMS--Clinical trial interim report. *Vision Res* 111, 149-160.

735 Stone, J.L., Barlow, W.E., Humayun, M.S., de Juan, E., Jr., and Milam, A.H. (1992).  
736 Morphometric analysis of macular photoreceptors and ganglion cells in retinas with retinitis  
737 pigmentosa. *Arch Ophthalmol* 110, 1634-1639.

738 Stone, M. (1977). An Asymptotic Equivalence of Choice of Model by Cross-Validation and  
739 Akaike's Criterion. *Journal of the Royal Statistical Society Series B (Methodological)* 39, 44-47.

740 Storn, R. (1996). On the usage of differential evolution for function optimization. In  
741 *Proceedings of North American Fuzzy Information Processing*, pp. 519-523.

742 Tahayori, B., Meffin, H., Sergeev, E.N., Mareels, I.M., Burkitt, A.N., and Grayden, D.B.  
743 (2014). Modelling extracellular electrical stimulation: part 4. Effect of the cellular composition of  
744 neural tissue on its spatio-temporal filtering properties. *J Neural Eng* 11, 065005.

745 Thompson, R.W., Jr., Barnett, G.D., Humayun, M.S., and Dagnelie, G. (2003). Facial  
746 recognition using simulated prosthetic pixelized vision. *Invest Ophthalmol Vis Sci* 44, 5035-5042.

747 Tobin, K.W., Chaum, E., Govindasamy, V.P., and Karnowski, T.P. (2007). Detection of  
748 anatomic structures in human retinal imagery. *IEEE Trans Med Imaging* 26, 1729-1739.

749 Tsai, D., Morley, J.W., Suaning, G.J., and Lovell, N.H. (2009). Direct activation of retinal  
750 ganglion cells with subretinal stimulation. *Conference proceedings : Annual International*  
751 *Conference of the IEEE Engineering in Medicine and Biology Society IEEE Engineering in*  
752 *Medicine and Biology Society Annual Conference 2009*, 618-621.

753 Van der Walt, S., Schönberger, J.S., Nunez-Iglesias, J., Boulogne, F., Warner, J.D., Yager,  
754 N., Gouillart, E., Yu, T., and contributors, s.-i. (2014). scikit-image: Image processing in Python.  
755 PeerJ 2.

756 Watson, A.B. (2014). A formula for human retinal ganglion cell receptive field density as a  
757 function of visual field location. *J Vis* 14.

758 Weiland, J.D., Walston, S.T., and Humayun, M.S. (2016). Electrical Stimulation of the Retina  
759 to Produce Artificial Vision. *Annu Rev Vis Sci* 2, 273-294.

760 Weitz, A.C., Nanduri, D., Behrend, M.R., Gonzalez-Calle, A., Greenberg, R.J., Humayun,  
761 M.S., Chow, R.H., and Weiland, J.D. (2015). Improving the spatial resolution of epiretinal  
762 implants by increasing stimulus pulse duration. *Sci Transl Med* 7, 318ra203.

763 Wilke, R., Gabel, V.P., Sachs, H., Bartz Schmidt, K.U., Gekeler, F., Besch, D., Szurman, P.,  
764 Stett, A., Wilhelm, B., Peters, T., *et al.* (2011a). Spatial resolution and perception of patterns  
765 mediated by a subretinal 16-electrode array in patients blinded by hereditary retinal dystrophies.  
766 *Invest Ophthalmol Vis Sci* 52, 5995-6003.

767 Wilke, R.G., Moghadam, G.K., Lovell, N.H., Suaning, G.J., and Dokos, S. (2011b). Electric  
768 crosstalk impairs spatial resolution of multi-electrode arrays in retinal implants. *J Neural Eng* 8,  
769 046016.

770 Yanai, D., Weiland, J.D., Mahadevappa, M., Greenberg, R.J., Fine, I., and Humayun, M.S.  
771 (2007). Visual performance using a retinal prosthesis in three subjects with retinitis pigmentosa.  
772 *Am J Ophthalmol* 143, 820-827.

773 Zrenner, E., Bartz-Schmidt, K.U., Benav, H., Besch, D., Bruckmann, A., Gabel, V.P.,  
774 Gekeler, F., Greppmaier, U., Harscher, A., Kibbel, S., *et al.* (2011). Subretinal electronic chips  
775 allow blind patients to read letters and combine them to words. *Proceedings Biological sciences /*  
776 *The Royal Society* 278, 1489-1497.

777
